# Supplementary material
Source: PubMed Central journal article supplement (PMC7338337)
Supplement: 12250_2020_218_MOESM1_ESM.pdf [file 12250_2020_218_MOESM1_ESM.pdf]

## Electronic Supplementary Material

### Development of a Novel Reverse Transcription Loop-Mediated Isothermal Amplification Method for Rapid Detection of SARS-CoV-2

Renfei Lu<sup>1#</sup>, Xiuming Wu<sup>2#</sup>, Zhenzhou Wan<sup>3</sup>, Yingxue Li<sup>2</sup>, Lulu Zuo<sup>2</sup>, Jianru Qin<sup>2,4</sup>, Xia Jin<sup>5</sup>, Chiyu Zhang<sup>2✉</sup>

1. Clinical Laboratory, Nantong Third Hospital Affiliated to Nantong University, Nantong 226006, China
2. Pathogen Discovery and Evolution Unit, Institut Pasteur of Shanghai, Chinese Academy of Sciences, Shanghai 200031, China
3. Medical Laboratory of Taizhou Fourth People's Hospital, Taizhou 225300 China
4. College of Life Sciences, Henan Normal University, Xinxiang 453007, China
5. Shanghai Public Health Clinical Center, Fudan University, Jinshan District, Shanghai 201508, China

# These authors contributed equally to this work.

Supporting information to DOI: 10.1007/s12250-020-00218-1

**Supplementary Table S1.** SARS-CoV2 detection in 24 clinical samples by the novel RT-LAMP assay and a commercial RT-qPCR assay.

| Clinical diagnosis | Sample No. | The RT-qPCR assay (Liferiver) (82 mins) |        | The novel RT-LAMP assay (40 mins) |
|--------------------|------------|-----------------------------------------|--------|-----------------------------------|
|                    |            | CT value                                | Result |                                   |
| COVID-19           | 20002088   | 31.8                                    | +      | +                                 |
| COVID-19           | 20002374   | 33.7                                    | +      | +                                 |
| COVID-19           | 20001949   | 33                                      | +      | +                                 |
| COVID-19           | 20002596   | 31                                      | +      | +                                 |
| COVID-19           | 20002245   | 38                                      | +      | +                                 |
| COVID-19           | 20002007   | 38                                      | +      | +                                 |
| COVID-19           | 20002123   | 40                                      | +      | +                                 |
| COVID-19           | 20002617   | 28.8                                    | +      | +                                 |
| COVID-19           | 20002807   | 32.3                                    | +      | +                                 |
| COVID-19           | 20002123   | 34                                      | +      | +                                 |
| COVID-19           | 20002428   | 30.3                                    | +      | +                                 |
| COVID-19           | 20002403   | 33                                      | +      | +                                 |
| COVID-19           | 20002522   | 38                                      | +      | +                                 |
| COVID-19           | 20002441   | 36                                      | +      | +                                 |
| COVID-19           | 20002156   | 35                                      | +      | +                                 |
| COVID-19           | 20002575   | 32                                      | +      | +                                 |
| COVID-19           | 20002907   | 34                                      | +      | +                                 |
| Non-COVID-19       | 20002750   | None                                    | -      | -                                 |
| Non-COVID-19       | 20002802   | None                                    | -      | -                                 |
| Non-COVID-19       | 20002804   | None                                    | -      | -                                 |
| Non-COVID-19       | 20002806   | None                                    | -      | -                                 |
| Non-COVID-19       | 20002731   | None                                    | -      | -                                 |
| Non-COVID-19       | 20002436   | None                                    | -      | -                                 |
| Non-COVID-19       | 20002708   | None                                    | -      | -                                 |

CT, threshold cycle; “+”, positive for SARS-CoV2; “-“, negative for SARS-CoV2.
